# Supplementary material for: Calcium Signaling in Vertebrate Development and Its Role in Disease
Source: Int J Mol Sci. 2018 Oct 30;19(11):3390. doi: 10.3390/ijms19113390 (PMC6274931; doi:10.3390/ijms19113390)
Supplement: Supplementary file 1 [file ijms-19-03390-s001.pdf]

**Supplementary table 1.** Common diseases associated with calcium channels and pumps, and their comparative embryonic expression patterns in mouse, zebrafish and *Xenopus* [1,136–138].

| Gene Symbol | Gene Name                                                      | Diseases/Disorders                                                                                                                                                                                            | Embryonic Expression in Mouse                                                                                                  | Embryonic Expression in Zebrafish                                                                                                                                                                                | Embryonic Expression in <i>Xenopus</i>                                                                                                                                                                                                                                                                                       |
|-------------|----------------------------------------------------------------|---------------------------------------------------------------------------------------------------------------------------------------------------------------------------------------------------------------|--------------------------------------------------------------------------------------------------------------------------------|------------------------------------------------------------------------------------------------------------------------------------------------------------------------------------------------------------------|------------------------------------------------------------------------------------------------------------------------------------------------------------------------------------------------------------------------------------------------------------------------------------------------------------------------------|
| Cacna1a     | Calcium channel, voltage-dependent, P/Q type, alpha 1A subunit | Spinocerebellar ataxia 6 (SCA6) [MIM:183086], Migraine, familial hemiplegic, 1 (FHM1) [MIM:141500], Episodic ataxia 2 (EA2) [MIM:108500], Epileptic encephalopathy, early infantile, 42 (EIEE42) [MIM:617106] | Earliest stage of expression is E11.5 , and this gene is expressed in the following tissues: Brain                             | Expression reported from 50% epiboly to Day 5 in following tissues: Central nervous system, cranial ganglion, neuron, retinal ganglion cell layer, Rohon-Beard neuron, spinal cord dorsal region, whole organism | Earliest stage of expression detected using ISH is stages 13 , and this gene is expressed in the following tissues: Auditory nerve, cranial placode, eye, facial nerve, forebrain, glossopharyngeal nerve, hindbrain, lens, midbrain, neural tube, pineal gland, retinal ganglion cell layer, retinal inner nuclear layer    |
| Cacna1b     | Calcium channel, voltage-dependent, N type, alpha 1B subunit   | Dystonia 23 (DYT23) [MIM:614860]                                                                                                                                                                              | Earliest stage of expression is E8.25 , and this gene is expressed in the following tissues: Embryo endoderm, brain and retina | Expression reported from day 5 to adult in brain, liver and whole organism                                                                                                                                       | Earliest stage of expression detected using ISH is stages 13 , and this gene is expressed in the following tissues: Auditory nerve, brain, cranial placode, eye, facial nerve, forebrain, glossopharyngeal nerve, hindbrain, lens, midbrain, neural tube, retinal ganglion cell layer, retinal inner nuclear layer, spinal c |
| Cacna1c     | Calcium channel, voltage-dependent, L type, alpha 1C subunit   | Timothy syndrome (TS) [MIM:601005], Brugada syndrome 3 (BRGDA3) [MIM:611875]                                                                                                                                  | Earliest stage of expression is E8.5 , and this gene is expressed in the following tissues: Heart                              | Expression reported from 20-25 somites to Day 5 in Central nervous system, ceratohyal cartilage, gut, lateral plate mesoderm                                                                                     | Earliest stage of expression detected using ISH is stages 13 , and this gene is expressed in the following tissues: Auditory nerve, brain, cranial ganglion, cranial placode, eye, facial nerve, forebrain, fused heart primordium, glossopharyngeal nerve, heart, hindbrain, lens, midbrain, neural tube, photoreceptor lay |

|         |                                                              |                                                                                                                                                                       |                                                                                                                                                                                                                                                                            |                                                                                                                                                                                                                             |                                                                                                                                                                                                                                                                                                           |
|---------|--------------------------------------------------------------|-----------------------------------------------------------------------------------------------------------------------------------------------------------------------|----------------------------------------------------------------------------------------------------------------------------------------------------------------------------------------------------------------------------------------------------------------------------|-----------------------------------------------------------------------------------------------------------------------------------------------------------------------------------------------------------------------------|-----------------------------------------------------------------------------------------------------------------------------------------------------------------------------------------------------------------------------------------------------------------------------------------------------------|
| Cacna1d | Calcium channel, voltage-dependent, L type, alpha 1D subunit | Sinoatrial node dysfunction and deafness (SANDD) [MIM:614896], Primary aldosteronism, seizures, and neurologic abnormalities (PASNA) [MIM:615474],                    | Earliest stage of expression is E9.5 , and this gene is expressed in the following tissues: Heart                                                                                                                                                                          | Expression reported from 20-cell to day 6 in anterior lateral line neuromast neuromast hair cell, central nervous system, neuromast hair cell presynaptic active zone, posterior lateral line neuromast neuromast hair cell | Earliest stage of expression detected using ISH is stages 24 , and this gene is expressed in the following tissues: Brain, eye, facial nerve, forebrain, fused heart primordium, heart, hindbrain, midbrain, otic placode, otic vesicle, photoreceptor layer, pineal gland, spinal cord, trigeminal nerve |
| Cacna1e | Calcium channel, voltage-dependent, R type, alpha 1E subunit | No disorders are reported                                                                                                                                             | Earliest stage of expression is E14.5, and this gene is expressed in the following tissues: Thalamus mantle layer, Cerebral and olfactory cortex mantle layer, telencephalon mantle layer, medulla oblongata basal plate mantle layer, pons mantle and trigeminal ganglion | Expression reported from day 5 in whole organism                                                                                                                                                                            | Earliest stage of expression detected using ISH is stages 24 , and this gene is expressed in the following tissues: Hindbrain, spinal cord                                                                                                                                                                |
| Cacna1f | Calcium channel, voltage-dependent, L type, alpha 1F subunit | Night blindness, congenital stationary, 2A (CSNB2A) [MIM:300071], Cone-rod dystrophy, X-linked 3 (CORDX3) [MIM:300476], Aaland island eye disease (AIED) [MIM:300600] |                                                                                                                                                                                                                                                                            | Expression reported from day 5 in whole organism Protruding-mouth to adult in photoreceptor cell synapse, retinal outer plexiform layer, retinal photoreceptor layer                                                        | Earliest stage of expression detected using ISH is stages 34 , and this gene is expressed in the following tissues: Eye, lens, retina, retinal ganglion cell layer, retinal inner nuclear layer                                                                                                           |
| Cacna1g | Calcium channel, voltage-dependent, T type, alpha 1G subunit | Spinocerebellar ataxia 42 (SCA42) [MIM:616795]:                                                                                                                       | Earliest stage of expression is E8.5 , and this gene is expressed in the following tissues: Brain, diencephalon, telencephalon, future spinal cord, primitive ventricle, hindlimb musculature, heart                                                                       | 75%-epiboly to day 5 in whole organism                                                                                                                                                                                      | Earliest stage of expression detected using ISH is stages 30 , and this gene is expressed in the following tissues: Brain, eye, facial nerve, forebrain, hindbrain, midbrain, olfactory epithelial support cell, otic placode, otic vesicle, pineal gland, spinal cord, trigeminal nerve                  |

|         |                                                              |                                                                                                                                                                          |                                                                                                                                                                                                                           |                                                                                                                                      |                                                                                                                                                                                                                                                                                                                   |
|---------|--------------------------------------------------------------|--------------------------------------------------------------------------------------------------------------------------------------------------------------------------|---------------------------------------------------------------------------------------------------------------------------------------------------------------------------------------------------------------------------|--------------------------------------------------------------------------------------------------------------------------------------|-------------------------------------------------------------------------------------------------------------------------------------------------------------------------------------------------------------------------------------------------------------------------------------------------------------------|
| Cacna1h | Calcium channel, voltage-dependent, T type, alpha 1H subunit | Epilepsy, idiopathic generalized 6 (EIG6) [MIM:611942], Epilepsy, childhood absence 6 (ECA6) [MIM:611942], Hyperaldosteronism, familial, 4 (HALD4) [MIM:617027]          | Earliest stage of expression is E8.5, and this gene is expressed in the following tissues: Neural tube floor plate, future spinal cord, dorsal root ganglion, brain, spinal cord floor plate, heart                       | 50%-epiboly to Pec-fin in adaxial cell, diencephalon, retinal ganglion cell layer, retinal inner nuclear layer                       | Earliest stage of expression detected using ISH is stages 13 , and this gene is expressed in the following tissues: Brain, eye, forebrain, fused heart primordium, heart, hindbrain, midbrain, neural tube, olfactory epithelial support cell, spinal cord                                                        |
| Cacna1i | Calcium channel, voltage-dependent, T type, alpha 1I subunit | Childhood Absence Epilepsy                                                                                                                                               | Earliest stage of expression is E11.5, and this gene is expressed in the following tissues: primitive ventricle, hindlimb musculature                                                                                     | 75%-epiboly to day 5 in whole organism                                                                                               | -                                                                                                                                                                                                                                                                                                                 |
| Cacna1s | Calcium channel, voltage-dependent, L type, alpha 1S subunit | Periodic paralysis hypokalemic 1 (HOKPP1) [MIM:170400], Malignant hyperthermia 5 (MHS5) [MIM:601887, Thyrotoxic periodic paralysis 1 (TTPP1) [MIM:188580]                | Earliest stage of expression is E9.5 , and this gene is expressed in the following tissues: Hindbrain, diencephalon lateral wall mantle layer, medulla oblongata basal plate mantle layer, cerebellum mantle layer, pons, | Expression reported from 20-25 somites stage                                                                                         | Earliest stage of expression detected using ISH is stages 7 , and this gene is expressed in the following tissues: Animal hemisphere, dorsal, dorsal marginal zone, ectoderm, epaxial muscle, mesoderm, muscle, musculature of face, paraxial mesoderm, pharyngeal arch, presomitic mesoderm, somite, tail somite |
| Ryr1    | ryanodine receptor 1, skeletal muscle                        | Malignant hyperthermia 1 (MHS1) [MIM:145600], Central core disease of muscle (CCD) [MIM:117000], Multiminicore disease with external ophthalmoplegia (MMDO) [MIM:255320] | Earliest stage of expression is E9.5 , and this gene is expressed in the following tissues: Diencephalon, telencephalon, hindbrain, future spinal cord, heart                                                             | Expression reported from 1-cell to adult in adaxial cell, fast muscle cell, heart, slow muscle cell, slow muscle cell, somite, trunk | Earliest stage of expression detected using ISH is stages 30 , and this gene is expressed in the following tissues: Epaxial muscle, muscle, myoblast, skeletal muscle                                                                                                                                             |

|       |                                                    |                                                                                                                                                                                                                                |                                                                                                                                                                                                                                                                       |                                                                                                        |                                                                                                                                    |
|-------|----------------------------------------------------|--------------------------------------------------------------------------------------------------------------------------------------------------------------------------------------------------------------------------------|-----------------------------------------------------------------------------------------------------------------------------------------------------------------------------------------------------------------------------------------------------------------------|--------------------------------------------------------------------------------------------------------|------------------------------------------------------------------------------------------------------------------------------------|
| Ryr2  | Ryanodine receptor 2, cardiac                      | Arrhythmogenic right ventricular dysplasia, familial, 2 (ARVD2) [MIM:600996], Ventricular tachycardia, catecholaminergic polymorphic, 1, with or without atrial dysfunction and/or dilated cardiomyopathy (CPVT1) [MIM:604772] | Earliest stage of expression is E7.5 , and this gene is expressed in the following tissues: Myotome, cerebral cortex, tongue, foot, mesenter, diaphragm, telencephalon, skeletal muscle                                                                               | Expression reported from 4-cell to adult in cardiac muscle, heart, heart primordium, heart tube, brain | -                                                                                                                                  |
| Ryr3  | Ryanodine receptor 3                               | arrhythmogenic right ventricular dysplasia, familial, 2, central core myopathy and alzheimer disease                                                                                                                           | Earliest stage of expression is E15, and this gene is expressed in the following tissues: Heart, somite, liver,                                                                                                                                                       | Expression reported from 4-cell to adult in brain, fast muscle cell, habenula, hindbrain               | -                                                                                                                                  |
| Orai1 | ORAI calcium release-activated calcium modulator 1 | Immunodeficiency 9 (IMD9) [MIM:612782], Myopathy, tubular aggregate, 2 (TAM2) [MIM:615883]                                                                                                                                     | Earliest stage of expression is E14, and this gene is expressed in the following tissues: Embryonic brain and limb musculature, other organs including, heart, liver, brain and metanephros                                                                           | Expression reported from 1-cell to Pec-fin in Brain heart liver myotome                                | -                                                                                                                                  |
| Orai2 | ORAI calcium release-activated calcium modulator 2 | No disorders are reported                                                                                                                                                                                                      | Earliest stage of expression is E14.5, and this gene is expressed in the following tissues: Neural tissue, brain including trigeminal ganglion, vagus ganglion, olfactory epithelium, nasal cavity respiratory epithelium                                             | -                                                                                                      | Earliest stage of expression detected using ISH is stages 10 , and this gene is expressed in the following tissues: Dorsal regions |
| Orai3 | ORAI calcium release-activated calcium modulator 3 | No disorders are reported                                                                                                                                                                                                      | Earliest stage of expression is , and this gene is expressed in the following tissues: Brain, trigeminal ganglion, neural retina, naris, nasal cavity respiratory epithelium, vibrissa, jaw, vestibulo-cochlear ganglion, vestibulo-cochlear ganglion and spinal cord | -                                                                                                      | -                                                                                                                                  |

|       |                                                                                                   |                                                                                                                            |                                                                                                                                                    |   |                                                                                                                                                                                                                                                                                                                                                                     |
|-------|---------------------------------------------------------------------------------------------------|----------------------------------------------------------------------------------------------------------------------------|----------------------------------------------------------------------------------------------------------------------------------------------------|---|---------------------------------------------------------------------------------------------------------------------------------------------------------------------------------------------------------------------------------------------------------------------------------------------------------------------------------------------------------------------|
| P2ry1 | Purinergic receptor P2Y, G-protein coupled, 1                                                     | renal cell carcinoma, nonpapillary, clopidogrel resistance                                                                 |                                                                                                                                                    | - | Earliest stage of expression detected using ISH is stages 1 , and this gene is expressed in the following tissues: Muscle                                                                                                                                                                                                                                           |
| P2ry2 | Purinergic receptor P2Y, G-protein coupled, 2                                                     | dry eye syndrome, lacrimal apparatus disease, cystic fibrosis                                                              |                                                                                                                                                    | - | -                                                                                                                                                                                                                                                                                                                                                                   |
| P2ry3 | Purinergic receptor P2Y, G-protein coupled, 3                                                     | Non-ammalian                                                                                                               | Earliest stage of expression is , and this gene is expressed in the following tissues:                                                             | - | -                                                                                                                                                                                                                                                                                                                                                                   |
| P2ry4 | pyrimidinergic receptor P2Y, G-protein coupled, 4                                                 | No disorders are reported                                                                                                  |                                                                                                                                                    | - | Earliest stage of expression detected using ISH is stages 14 , and this gene is expressed in the following tissues: Anterior neural ridge, chordal neural plate, cranial neural crest, neural crest, neural plate, neural tube, posterior neural tube, pre-chordal neural plate, tail bud, cranial neural crest, mandibular arch, neural crest, neural plate border |
| P2ry5 | Purinergic receptor P2Y, G-Protein Coupled, 5. New name- Lysophosphatidic Acid Receptor 6 (LPAR6) | Woolly hair autosomal recessive 1 with or without hypotrichosis (ARWH1) [MIM:278150], Hypotrichosis 8 (HYPT8) [MIM:278150] | Earliest stage of expression is E1, and this gene is expressed in the following tissues: Skeletal muscle                                           | - | -                                                                                                                                                                                                                                                                                                                                                                   |
| P2ry6 | pyrimidinergic receptor P2Y, G-protein coupled, 6                                                 | No disorders are reported                                                                                                  | Earliest stage of expression is E9, and this gene is expressed in the following tissues: Blastocyst-stage conceptus, foregut                       | - | -                                                                                                                                                                                                                                                                                                                                                                   |
| P2ry7 | Purinergic receptor P2Y, G-Protein Coupled, 7, New name- Leukotriene B4 Receptor                  | specific language impairment, asthma                                                                                       | Earliest stage of expression is E15, and this gene is expressed in the following tissues: Dermomyotome, muscle tissue, vertebral axis, musculature | - | -                                                                                                                                                                                                                                                                                                                                                                   |

|        |                                                                          |                                                                                  |                                                                                                                                                                                                                 |                                                                                            |                                                                                                                                                                                                                                        |
|--------|--------------------------------------------------------------------------|----------------------------------------------------------------------------------|-----------------------------------------------------------------------------------------------------------------------------------------------------------------------------------------------------------------|--------------------------------------------------------------------------------------------|----------------------------------------------------------------------------------------------------------------------------------------------------------------------------------------------------------------------------------------|
| P2ry8  | P2Y receptor family member 8                                             | Non-mammalian                                                                    | Earliest stage of expression is , and this gene is expressed in the following tissues: Lateral ventricle and brain                                                                                              | -                                                                                          | -                                                                                                                                                                                                                                      |
| P2ry9  | P2Y receptor family member 9, New name- Lysophosphatidic Acid Receptor 4 | differentiated thyroid carcinoma                                                 |                                                                                                                                                                                                                 | -                                                                                          | -                                                                                                                                                                                                                                      |
| P2ry10 | P2Y receptor family member 10                                            | No disorders are reported                                                        | Earliest stage of expression is E14.5, and this gene is expressed in the following tissues: Future brain, including future midbrain and future hindbrain, 1st branchial arch maxillary component, somite, liver | -                                                                                          | -                                                                                                                                                                                                                                      |
| P2ry11 | Purinergic receptor P2Y, G-protein coupled, 11                           | Narcolepsy                                                                       | Earliest stage of expression is , and this gene is expressed in the following tissues: Thymus primordium                                                                                                        | -                                                                                          | Earliest stage of expression detected using ISH is stages 11 , and this gene is expressed in the following tissues: Mesoderm and notochord                                                                                             |
| P2ry12 | Purinergic receptor P2Y, G-protein coupled, 12                           | Bleeding disorder, platelet-type 8 (BDPLT8) [MIM:609821], coronary heart disease |                                                                                                                                                                                                                 | -                                                                                          |                                                                                                                                                                                                                                        |
| P2ry13 | Purinergic receptor P2Y, G-protein coupled, 13                           | No disorders are reported                                                        |                                                                                                                                                                                                                 | -                                                                                          |                                                                                                                                                                                                                                        |
| P2ry14 | Purinergic receptor P2Y14                                                | No disorders are reported                                                        |                                                                                                                                                                                                                 | -                                                                                          |                                                                                                                                                                                                                                        |
| Trpc1  | transient receptor potential cation channel, subfamily C, member 1       | Pulmonary hypertension                                                           | Earliest stage of expression is E12.0 , and this gene is expressed in the following tissues: Vagus ganglion, DRG                                                                                                | Expression reported from adult in Brain, bulbus arteriosus, cranial ganglion, diencephalon | Earliest stage of expression detected using ISH is stages 20 , and this gene is expressed in the following tissues: Brain, central nervous system, cranial nerve, profundal placode, spinal cord, trigeminal nerve, trigeminal placode |

|       |                                                                    |                                                                                          |                                                                                                                                                                                                                                   |                                                                                                                                                      |                                                                                                                                                                                                                                        |
|-------|--------------------------------------------------------------------|------------------------------------------------------------------------------------------|-----------------------------------------------------------------------------------------------------------------------------------------------------------------------------------------------------------------------------------|------------------------------------------------------------------------------------------------------------------------------------------------------|----------------------------------------------------------------------------------------------------------------------------------------------------------------------------------------------------------------------------------------|
| Trpc2 | transient receptor potential cation channel, subfamily C, member 2 | No disorders are reported                                                                | Earliest stage of expression is E12.5 , and this gene is expressed in the following tissues: Metanephros, ovary, testis, mesonephros of female, reproductive system, urogenital mesentery, DRG, vagus ganglion, primitive bladder | Expression reported from Prim-5 to adult in microvillous olfactory receptor neuron, olfactory epithelium, olfactory receptor cell, olfactory rosette | Earliest stage of expression detected using ISH is stages 28 , and this gene is expressed in the following tissues: Brain, central nervous system, eye, hindbrain, melanophore, neural crest, optic vesicle, otic vesicle, spinal cord |
| Trpc3 | transient receptor potential cation channel, subfamily C, member 3 | Spinocerebellar ataxia 41 (SCA41) [MIM:616410]                                           | Earliest stage of expression is E11.5 , and this gene is expressed in the following tissues: Limb, trunk somite, vagus ganglion, DRG, vagus ganglion                                                                              | Expression reported from Prim-5 to Day 5 in cerebellum, diencephalon, dorsal telencephalon, hindbrain                                                |                                                                                                                                                                                                                                        |
| Trpc4 | transient receptor potential cation channel, subfamily C, member 4 | No disorders are reported                                                                | Earliest stage of expression is E11.5 , and this gene is expressed in the following tissues: Brain, trunk somite, brain stem, cerebral cortex, cerebellum, vagus ganglion, DRG                                                    | Expression reported from Prim-5 to adult in cranial ganglion, dorsal telencephalon, epibranchial ganglion, glossopharyngeal ganglion                 |                                                                                                                                                                                                                                        |
| Trpc5 | transient receptor potential cation channel, subfamily C, member 5 | congenital hypertrophic pyloric stenosis, hypertensive disease                           | Earliest stage of expression is E11.5 , and this gene is expressed in the following tissues: Brain, vagus ganglion, DRG                                                                                                           | Expression reported from Prim-5 to adult in brain, habenula, head, hindBrain                                                                         |                                                                                                                                                                                                                                        |
| Trpc6 | transient receptor potential cation channel, subfamily C, member 6 | Congenital nephrotic syndrome, Focal segmental glomerulosclerosis 2 (FSGS2) [MIM:603965] | Earliest stage of expression is E12.0 , and this gene is expressed in the following tissues: Vagus ganglion, DRG                                                                                                                  | Expression reported from to adult in trigeminal motor nucleus, cardiac ventricle, cloacal chamber, dorsal aorta and gut                              |                                                                                                                                                                                                                                        |
| Trpv1 | transient receptor potential cation channel, subfamily V, member 1 | somatoform disorder, urinary bladder disease                                             | Earliest stage of expression is E11.5 , and this gene is expressed in the following tissues: Diencephalon, telencephalon, hindbrain, future spinal cord                                                                           | Expression reported from 4-cell to adult in anterior lateral line ganglion, brain, epidermal cell and epithelium                                     | Earliest stage of expression detected using ISH is stages 20 , and this gene is expressed in the following tissues: Trigeminal ganglia, dorsal neural tube, Rohon Beard neurons and somites                                            |

|       |                                                                    |                                                                                                                                                                                                                                                                  |                                                                                                                                                                                                                 |                                                                                                                                                                                                |                                                                                                                                                                                                                                          |
|-------|--------------------------------------------------------------------|------------------------------------------------------------------------------------------------------------------------------------------------------------------------------------------------------------------------------------------------------------------|-----------------------------------------------------------------------------------------------------------------------------------------------------------------------------------------------------------------|------------------------------------------------------------------------------------------------------------------------------------------------------------------------------------------------|------------------------------------------------------------------------------------------------------------------------------------------------------------------------------------------------------------------------------------------|
| Trpv2 | transient receptor potential cation channel, subfamily V, member 2 | dentin sensitivity, lymphoma of retina                                                                                                                                                                                                                           | Earliest stage of expression is E14.5, and this gene is expressed in the following tissues: Future brain, including future midbrain and future hindbrain, 1st branchial arch maxillary component, somite, liver | -                                                                                                                                                                                              | Earliest stage of expression detected using ISH is stages 1 , and this gene is expressed in the following tissues: Animal pole, and in the cement gland, neural tube, trigeminal ganglia and otic vesicle at later stages of development |
| Trpv3 | transient receptor potential cation channel, subfamily V, member 3 | Olmsted syndrome (OLMS) [MIM:614594], Palmoplantar keratoderma, non-epidermolytic, focal 2 (FNEPPK2) [MIM:616400]                                                                                                                                                | Earliest stage of expression is E11.5, and this gene is expressed in the following tissues: Diencephalon, telencephalon, hindbrain, futurespinal cord                                                           | -                                                                                                                                                                                              | Trpv3 is not detected using ISH and RT-PCR throughout embryonic stages.                                                                                                                                                                  |
| Trpv4 | transient receptor potential cation channel, subfamily V, member 4 | Brachyolmia 3 (BCYM3) [MIM:113500], Spondylometaphyseal dysplasia Kozlowski type (SMDK) [MIM:184252], Metatropic dysplasia (MTD) [MIM:156530], Neuronopathy, distal hereditary motor, 8 (HMN8) [MIM:600175], Charcot-Marie-Tooth disease 2C (CMT2C) [MIM:606071] | Earliest stage of expression is E11.5 , and this gene is expressed in the following tissues: Diencephalon, telencephalon, hindbrain, futurespinal cord                                                          | Expression reported from 4-cell to adult in atrioventricular canal atrioventricular canal endocardium endothelial cell atrioventricular canal endocardium atrioventricular canal morphogenesis | Earliest stage of expression detected using ISH is stages 1 , and this gene is expressed in the following tissues: Animal pole, and in the tailbud region and notochord and nasal placode at later stages of development.                |
| Trpv5 | transient receptor potential cation channel, subfamily V, member 5 | Pseudohermaphroditism, female, due to placental aromatase deficiency                                                                                                                                                                                             | Earliest stage of expression is E15.5, and this gene is expressed in the following tissues: Hypothalamus, neocortex, ganglionic eminence, main olfactory bulb, spinal cord                                      | -                                                                                                                                                                                              | Earliest stage of expression detected using ISH is stages 15, and this gene is expressed in the following tissues: Proctodeum, branchial arches and punctate expression in epidermis.                                                    |

|       |                                                                    |                                                                         |                                                                                                                                                                                                                                                                                                                 |                                                                                                                                                                                                                                  |                                                                                                                               |
|-------|--------------------------------------------------------------------|-------------------------------------------------------------------------|-----------------------------------------------------------------------------------------------------------------------------------------------------------------------------------------------------------------------------------------------------------------------------------------------------------------|----------------------------------------------------------------------------------------------------------------------------------------------------------------------------------------------------------------------------------|-------------------------------------------------------------------------------------------------------------------------------|
| Trpv6 | transient receptor potential cation channel, subfamily V, member 6 | Pseudohermaphroditism, female, due to placental aromatase deficiency    | Earliest stage of expression is E11.5 , and this gene is expressed in the following tissues: Diencephalon, hindbrain, midbrain, future spinal cord, stomach epithelium, metanephros, stomach                                                                                                                    | Expression reported from 1-cell to adult in amacrine cell, anterior crista hair cell, atrium and blastomere                                                                                                                      | Earliest stage of expression detected using ISH is stages 15, and this gene is expressed in the following tissues: Epidermis. |
| Trpm1 | transient receptor potential cation channel, subfamily M, member 1 | Night blindness, congenital stationary, 1C (CSNB1C) [MIM:613216]        | Earliest stage of expression is E11.5 , and this gene is expressed in the following tissues: Eye, pigmented retinal epithelium, genital tubercle, reproductive system, retina                                                                                                                                   | Expression reported from Prim-5 to adult in optic furrow, presumptive retinal pigmented epithelium, retinal inner nuclear layer, retinal pigmented epithelium, ciliary marginal zone, melanoblast, neural crest cell, and retina |                                                                                                                               |
| Trpm2 | transient receptor potential cation channel, subfamily M, member 2 | No disorders are reported                                               | Earliest stage of expression is E10.5 , and this gene is expressed in the following tissues: Central nervous system including choroid plexus, cranial ganglion, ear, eye, face, gut, heart, limb, liver, lung, hemolymphoid system, main olfactory bulb, nephros, salivary gland, thyroid gland, urinary system | Expression reported from Prim-5 to adult in cranial ganglion, hindbrain, integument, and keratinocyte                                                                                                                            |                                                                                                                               |
| Trpm3 | transient receptor potential cation channel, subfamily M, member 3 | Retinal dystrophy and iris coloboma with or without congenital cataract | Earliest stage of expression is E12.0 , and this gene is expressed in the following tissues: Neural retinal epithelium, dorsal root ganglion, inferior vagus ganglion                                                                                                                                           | Expression reported from Prim-5 to adult in choroid plexus, dorsal thalamus, epiphysis, and habenula                                                                                                                             |                                                                                                                               |
| Trpm4 | transient receptor potential cation channel, subfamily M, member 4 | Progressive familial heart block 1B (PFHB1B) [MIM:604559]               | Earliest stage of expression is E12.0 , and this gene is expressed in the following tissues: Inferior vagus ganglion, DRG                                                                                                                                                                                       | Expression reported from 1-cell to adult in Brain, cloacal chamber, integument, and intestinal bulb                                                                                                                              |                                                                                                                               |

|       |                                                                    |                                                                                                                  |                                                                                                                           |                                                                                                              |                                                                                                                                                                                                                                                                                                                             |
|-------|--------------------------------------------------------------------|------------------------------------------------------------------------------------------------------------------|---------------------------------------------------------------------------------------------------------------------------|--------------------------------------------------------------------------------------------------------------|-----------------------------------------------------------------------------------------------------------------------------------------------------------------------------------------------------------------------------------------------------------------------------------------------------------------------------|
| Trpm5 | transient receptor potential cation channel, subfamily M, member 5 | Beckwith-wiedemann syndrome                                                                                      | Earliest stage of expression is E12.0 , and this gene is expressed in the following tissues: Inferior vagus ganglion, DRG | Expression reported from Protruding-mouth to adult in barbel, gill taste receptor cell, gill, and gill raker |                                                                                                                                                                                                                                                                                                                             |
| Trpm6 | transient receptor potential cation channel, subfamily M, member 6 | Hypomagnesemia 1 (HOMG1), including seizures and muscle spasms, during infancy [MIM:602014]                      | Earliest stage of expression is E12.0 , and this gene is expressed in the following tissues: Inferior vagus ganglion, DRG | Expression reported from 1-cell to adult in Brain, gill, gut, and heart                                      | Earliest stage of expression detected using ISH is stages 17 , and this gene is expressed in the following tissues: Anterior placodal area, brain, cement gland primordium, endoderm, neural plate border, non-neural ectoderm, notochord, posterior, primary heart field, spinal cord                                      |
| Trpm7 | transient receptor potential cation channel, subfamily M, member 7 | Neurodegenerative disorder amyotrophic lateral sclerosis-parkinsonism/dementia complex 1 (ALS-PDC1) [MIM:105500] | Earliest stage of expression is E12.0 , and this gene is expressed in the following tissues: Inferior vagus ganglion, DRG | Expression reported from to adult in corpuscles of Stannius, epidermis, epiphysis, and head                  | Earliest stage of expression detected using ISH is stages 2 , and this gene is expressed in the following tissues: Rohon-Beard neuron, animal cap, animal pole, axial mesoderm, brain, branchial arch, cardiac mesoderm, head region, intersomitic region, involuted dorsal mesoderm, late distal tubule, neuron, notochord |
| Trpm8 | transient receptor potential cation channel, subfamily M, member 8 | Lichen sclerosus et atrophicus, migraine with or without aura 1                                                  | Earliest stage of expression is E12.0 , and this gene is expressed in the following tissues: Inferior vagus ganglion, DRG | -                                                                                                            |                                                                                                                                                                                                                                                                                                                             |

|       |                                                      |                                                                                                                                        |                                                                                                                                                                                                                         |                                                                                                                                                      |                                                                                                                                                                                                                                                                                                                                                                                                                         |
|-------|------------------------------------------------------|----------------------------------------------------------------------------------------------------------------------------------------|-------------------------------------------------------------------------------------------------------------------------------------------------------------------------------------------------------------------------|------------------------------------------------------------------------------------------------------------------------------------------------------|-------------------------------------------------------------------------------------------------------------------------------------------------------------------------------------------------------------------------------------------------------------------------------------------------------------------------------------------------------------------------------------------------------------------------|
| Stim1 | stromal interaction molecule 1                       | Immunodeficiency 10 (IMD10) [MIM:612783], Myopathy, tubular aggregate, 1 (TAM1) [MIM:160565], Stormorken syndrome (STRMK) [MIM:185070] | Earliest stage of expression is E7.5, and this gene is expressed in the following tissues: Embryo, embryonic brain, heart, liver, gut, urinary system, extraembryonic component                                         | -                                                                                                                                                    | Earliest stage of expression detected using ISH is stages 3 , and this gene is expressed in the following tissues: Animal hemisphere, animal pole, cement gland, cement gland primordium, ectoderm, eye, head, head region, involuted dorsal mesoderm, involuted ventral mesoderm, involuting marginal zone, marginal zone,, brain, central nervous system, growth cone, notochord, process, spinal cord, spinal neuron |
| Stim2 | stromal interaction molecule 2                       | Stormorken syndrome and myopathy, tubular aggregate 1                                                                                  |                                                                                                                                                                                                                         | -                                                                                                                                                    |                                                                                                                                                                                                                                                                                                                                                                                                                         |
| P2rx1 | Purinergic receptor P2X, ligand gated ion channel, 1 | Neurogenic dysfunction of the urinary bladder, dilated cardiomyopathy and ctrct3                                                       | Earliest stage of expression is E14.5, and this gene is expressed in the following tissues: <u>Pancreatic epithelium</u>                                                                                                | Expression reported from Prim-15 stage in hypothalamus and midbrain                                                                                  |                                                                                                                                                                                                                                                                                                                                                                                                                         |
| P2rx2 | Purinergic receptor P2X, ligand gated ion channel, 2 | Deafness, autosomal dominant, 41 (DFNA41) [MIM:608224], Neurogenic bladder, bladder disease                                            | Earliest stage of expression is E14.5, and this gene is expressed in the following tissues: Medulla oblongata basal plate mantle layer, VG, facial ganglion,                                                            | Expression reported from Prim-15 to Pec-fin stage in cranial ganglion, facial ganglion, glossopharyngeal ganglion, and Rohon-Beard neuron            |                                                                                                                                                                                                                                                                                                                                                                                                                         |
| P2rx3 | Purinergic receptor P2X, ligand gated ion channel, 3 | Cystitis and migraine with or without aura 1                                                                                           | Earliest stage of expression is E14.5, and this gene is expressed in the following tissues: Medulla oblongata basal plate, facial ganglion, glossopharyngeal ganglion, trigeminal ganglion, vestibulo-cochlear ganglion | Expression reported from Prim-15 to Protruding-mouth stage in CNS neuron (sensu Vertebrata), cranial ganglion, head ectoderm, and Rohon-Beard neuron |                                                                                                                                                                                                                                                                                                                                                                                                                         |
| P2rx4 | Purinergic receptor P2X, ligand gated ion channel, 4 | Chronic pain                                                                                                                           | Earliest stage of expression is E11.5 , and this gene is expressed in the following tissues: Hindbrain, midbrain, future spinal cord                                                                                    | Expression reported from 1-cell to Pec-fin stage                                                                                                     |                                                                                                                                                                                                                                                                                                                                                                                                                         |

|       |                                                      |                                                                                                                                           |                                                                                                                                                                                                                                             |                                                                                                                                          |                                                                                                                                                             |
|-------|------------------------------------------------------|-------------------------------------------------------------------------------------------------------------------------------------------|---------------------------------------------------------------------------------------------------------------------------------------------------------------------------------------------------------------------------------------------|------------------------------------------------------------------------------------------------------------------------------------------|-------------------------------------------------------------------------------------------------------------------------------------------------------------|
| P2rx5 | Purinergic receptor P2X, ligand gated ion channel, 5 | Cystinosis                                                                                                                                | Earliest stage of expression is E8.5 , and this gene is expressed in the following tissues: Future brain, neural ectoderm, future spinal cord, dorsal root ganglion,                                                                        | Expression reported from Prim-5 to Prim-15 stage in muscle skeletal, muscle cell and somite                                              |                                                                                                                                                             |
| P2rx6 | Purinergic receptor P2X, ligand gated ion channel, 6 | No disorders are reported                                                                                                                 | Earliest stage of expression is E10.5 , and this gene is expressed in the following tissues: Heart                                                                                                                                          | -                                                                                                                                        |                                                                                                                                                             |
| P2rx7 | Purinergic receptor P2X, ligand gated ion channel, 7 | Extrapulmonary tuberculosis, bone cancer, tularemia and root resorption                                                                   | Earliest stage of expression is E17.5 , and this gene is expressed in the following tissues: Metanephros, heart, brain                                                                                                                      | Expression reported from 1-cell to Pec-fin stage in Brain, midBrain hindBrain boundary, pronephric duct and spinal cord                  |                                                                                                                                                             |
| P2rx8 | Purinergic receptor P2X, ligand gated ion channel, 8 | No disorders are reported                                                                                                                 | -                                                                                                                                                                                                                                           | Expression reported from Prim-15 to Pec-fin stage in cranial ganglion, hypothalamus, lateral hypothalamic nucleus and Rohon-Beard neuron |                                                                                                                                                             |
| Itpr1 | Inositol 1,4,5-trisphosphate receptor 1              | Spinocerebellar ataxia 15 (SCA15) [MIM:606658], Spinocerebellar ataxia 29 (SCA29) [MIM:117360] and Gillespie syndrome (GLSP) [MIM:206700] | Earliest stage of expression is E5.5 , and this gene is expressed in the following tissues: Embryo, primitive streak, mesoderm, neural tube, heart, branchial arch, somite, CNS, alimentary system, pituitary gland, reproductive structure | Expression reported from 1-cell to adult in whole organism, including cerebellum, granule cell, hindbrain and optic tectum               | Earliest stage of expression detected using ISH is stages 1 , and this gene is expressed in the following tissues: Cytoplasm, oocyte, subcortical cytoplasm |
| Itpr2 | Inositol 1,4,5-trisphosphate receptor 2              | Anhidrosis, isolated, with normal sweat glands (ANHD) [MIM:106190] and absence of sweating                                                | Earliest stage of expression is E14.5, and this gene is expressed in the following tissues: Medulla oblongata, appendages, scapula                                                                                                          | Expression reported from 64-cell stage in whole organism                                                                                 |                                                                                                                                                             |

|        |                                                                      |                                                                                       |                                                                                                                                                                                                                                                                  |                                                                                                                                                                 |                                                                                                                                                                                                                                                              |
|--------|----------------------------------------------------------------------|---------------------------------------------------------------------------------------|------------------------------------------------------------------------------------------------------------------------------------------------------------------------------------------------------------------------------------------------------------------|-----------------------------------------------------------------------------------------------------------------------------------------------------------------|--------------------------------------------------------------------------------------------------------------------------------------------------------------------------------------------------------------------------------------------------------------|
| Itpr3  | Inositol 1,4,5-triphosphate receptor 3                               | Alzheimer disease, coronary artery aneurysm, peritoneum cancer, and diabetes mellitus | Earliest stage of expression is E14.5, and this gene is expressed in the following tissues: Appendage bones, basioccipital bone, turbinate bone primordium, vault of skull, orbito-sphenoid, otic capsule, nasal septum, rib, axial skeleton, Meckel's cartilage | Expression reported from 64-cell to protruding-mouth stage in brain, head, heart and heart tube                                                                 |                                                                                                                                                                                                                                                              |
| Atp2a1 | ATPase, Ca <sup>2+</sup> transporting, cardiac muscle, fast twitch 1 | Brody myopathy (BRM) [MIM:601003], Wolfram syndrome 2 and myotonic disease            | Earliest stage of expression is E14.5, and this gene is expressed in the following tissues: Appendage mesenchyme, tail mesenchyme, diaphragm, tongue, foot                                                                                                       | Expression reported from 2-cell to adult in adaxial cell, eye, gill and mesoderm                                                                                |                                                                                                                                                                                                                                                              |
| Atp2a2 | ATPase, Ca <sup>2+</sup> transporting, cardiac muscle, slow twitch 2 | Acrokeratosis verruciformis (AKV) [MIM:101900] and Darier disease (DD) [MIM:124200]   | Earliest stage of expression is E14.5, and this gene is expressed in the following tissues: Pancreas epithelium, interventricular septum, atrioventricular bundle, impulse conducting system                                                                     | Expression reported from 1-cell to adult in axis, myotome, pectoral fin and pectoral fin musculature, atrium, cardiac ventricle, cephalic musculature and heart | Earliest stage of expression detected using ISH is stages 14, and this gene is expressed in the following tissues: Branchial arch, cement gland, ectoderm, eye, heart, lens, mesenchyme, neural plate, neural tube, proctodeum, pronephric kidney, retina    |
| Atp2a3 | ATPase, Ca <sup>2+</sup> transporting, cardiac muscle, slow twitch 3 | Darier-white disease and brody myopathy                                               |                                                                                                                                                                                                                                                                  | Expression reported from Day 5 to adult in Purkinje cell                                                                                                        | Earliest stage of expression detected using ISH is stages 1, and this gene is expressed in the following tissues: Cement gland, ectoderm, ectodermal cell, marginal zone, neural plate, neuroectoderm, stage VI oocyte, vegetal, vegetal pole, zygote cortex |
| Atp2b1 | ATPase, Ca <sup>2+</sup> transporting, plasma membrane 1             | Deafness, autosomal dominant, 25                                                      | Earliest stage of expression is E9.5, and this gene is expressed in the following tissues: CNS, appendages, ear, alimentary system, urinary system, integumental system, yes, lung, pituitary gland                                                              |                                                                                                                                                                 |                                                                                                                                                                                                                                                              |

|        |                                                  |                                                                                                                                |                                                                                                                                                                                                                                                           |  |  |
|--------|--------------------------------------------------|--------------------------------------------------------------------------------------------------------------------------------|-----------------------------------------------------------------------------------------------------------------------------------------------------------------------------------------------------------------------------------------------------------|--|--|
| Atp2b2 | ATPase, Ca2+ transporting, plasma membrane 2     | Deafness, autosomal recessive 12 and leber congenital amaurosis                                                                | Earliest stage of expression is E12.5 , and this gene is expressed in the following tissues: CNS, pituitary gland, DRG, choroid plexus, facial ganglion, glossopharyngeal ganglia, trigeminal ganglia, olfactory <del>cortex</del> <u>niliform cortex</u> |  |  |
| Atp2b3 | ATPase, Ca2+ transporting, plasma membrane 3     | Spinocerebellar ataxia, X-linked 1 (SCAX1) [MIM:302500], and microcephaly                                                      | Earliest stage of expression is E12.5 , and this gene is expressed in the following tissues: CNS, ear, alimentary system, spleen primordium, reproductive system, <u>liver</u>                                                                            |  |  |
| Atp2b4 | ATPase, Ca2+ transporting, plasma membrane 4     | Schnyder corneal dystrophy. Long-QT syndrome and malaria susceptibility                                                        | Earliest stage of expression is E9.5, and this gene is expressed in the following tissues: Heart, CNS, including ventral gray horn and <u>Spinal cord and liver</u>                                                                                       |  |  |
| Atp2c1 | ATPase, Ca2+-sequestering                        | Hailey-Hailey disease (HHD) [MIM:169600], benign chronic pemphigus, darier-white disease and skin disease                      | Earliest stage of expression is E8.5, and this gene is expressed in the following tissues: Embryo, and adult tissues including, brain, heart, stomach, colon, liver and lung                                                                              |  |  |
| Atp2c2 | ATPase Secretory Pathway Ca2+ Transporting 2     | Dyslexia, darier-white disease and speech and <u>communication disorder</u>                                                    |                                                                                                                                                                                                                                                           |  |  |
| Atp1a1 | ATPase, Na+/K+ transporting, alpha 1 polypeptide | Aldosterone-producing adenoma, thyrotoxic periodic paralysis, endocrine organ benign neoplasm and organ system benign neoplasm | Earliest stage of expression is E9.5 , and this gene is expressed in the following tissues: Heart, nervous system including spinal cord and DRG, limbs, tail, cranium, choroid plexus, pituitary gland, cardiovascular system                             |  |  |

|        |                                                                           |                                                                                                                                                                                                              |                                                                                                                                                                                                                                                                             |  |  |
|--------|---------------------------------------------------------------------------|--------------------------------------------------------------------------------------------------------------------------------------------------------------------------------------------------------------|-----------------------------------------------------------------------------------------------------------------------------------------------------------------------------------------------------------------------------------------------------------------------------|--|--|
| Atp1a2 | ATPase Na <sup>+</sup> /K <sup>+</sup> Transporting Subunit Alpha 2       | Migraine, familial hemiplegic, 2 (FHM2) [MIM:602481] and Alternating hemiplegia of childhood 1 (AHC1) [MIM:104290]                                                                                           | Earliest stage of expression is E9.5, and this gene is expressed in the following tissues: Primitive ventricle, heart atrium, myotome, future brain, limbs, reproduction system and tail                                                                                    |  |  |
| Atp1a3 | ATPase, Na <sup>+</sup> /K <sup>+</sup> transporting, alpha 3 polypeptide | Dystonia 12 (DYT12) [MIM:128235], Alternating hemiplegia of childhood 2 (AHC2) [MIM:614820], and Cerebellar ataxia, areflexia, pes cavus, optic atrophy, and sensorineural hearing loss (CAPOS) [MIM:601338] | Earliest stage of expression is E9.5 , and this gene is expressed in the following tissues: Neural tube, telencephalon marginal layer, hindbrain, eye, optic stalk, heart, cranial ganglion, future spinal cord, main olfactory bulb, respiratory system, alimentary system |  |  |
| Atp1b1 | ATPase, Na <sup>+</sup> /K <sup>+</sup> transporting, beta 1 polypeptide  | Hemiplegic migraine and fuchs' endothelial dystrophy, and hypertension-essential                                                                                                                             | Earliest stage of expression is E11.5 , and this gene is expressed in the following tissues: Brain including diencephalon, telencephalon, hindbrain, future spinal cord, colliculus, choroid plexus, pituitary gland, ear, thyroid gland, ureter, respiratory system        |  |  |
